# Supplementary material for: Abietane diterpenoid of Salvia sahendica Boiss and Buhse potently inhibits MCF-7 breast carcinoma cells by suppression of the PI3K/AKT pathway
Source: Royal Society of Chemistry journal article supplement (doi:10.1039/c4ra14905j), 2015-01-01
Supplement: c4ra14905j1.pdf [file c4ra14905j1.pdf]

# Abietane diterpenoid of *Salvia Sahendica* Boiss and Buhse potently inhibits MCF-7 breast carcinoma cells by suppression of PI3K/AKT pathway

Vala Kafil<sup>a, b, c†</sup>, Morteza Eskandani<sup>a, b†</sup>, Yadollah Omid<sup>a, c</sup>, Hossein Nazemiyeh<sup>a, c \*</sup>, Jaleh Barar<sup>a, c \*\*</sup>

<sup>a</sup> Research Center for Pharmaceutical Nanotechnology, Tabriz University of Medical Sciences, Tabriz, Iran

<sup>b</sup> Student Research Committee, Faculty of Pharmacy, Tabriz University of Medical Sciences, Tabriz, Iran

<sup>c</sup> Faculty of Pharmacy, Tabriz University of Medical Sciences, Tabriz, Iran

<sup>†</sup> *These authors contributed equally to this work and should be considered as first authors.*

---

## Corresponding authors:

\* Hossein Nazemiyeh, Professor of Pharmacognosy, [Nazemiyehh@tbzmed.ac.ir](mailto:Nazemiyehh@tbzmed.ac.ir), Tel: +98 41 333367014, Fax: +98 41 33367929

\*\* Jaleh Barar, Associate Professor of Biomedicine, [jbarar@tbzmed.ac.ir](mailto:jbarar@tbzmed.ac.ir), Tel: +98 41 33367914, Fax: +98 41 33367929

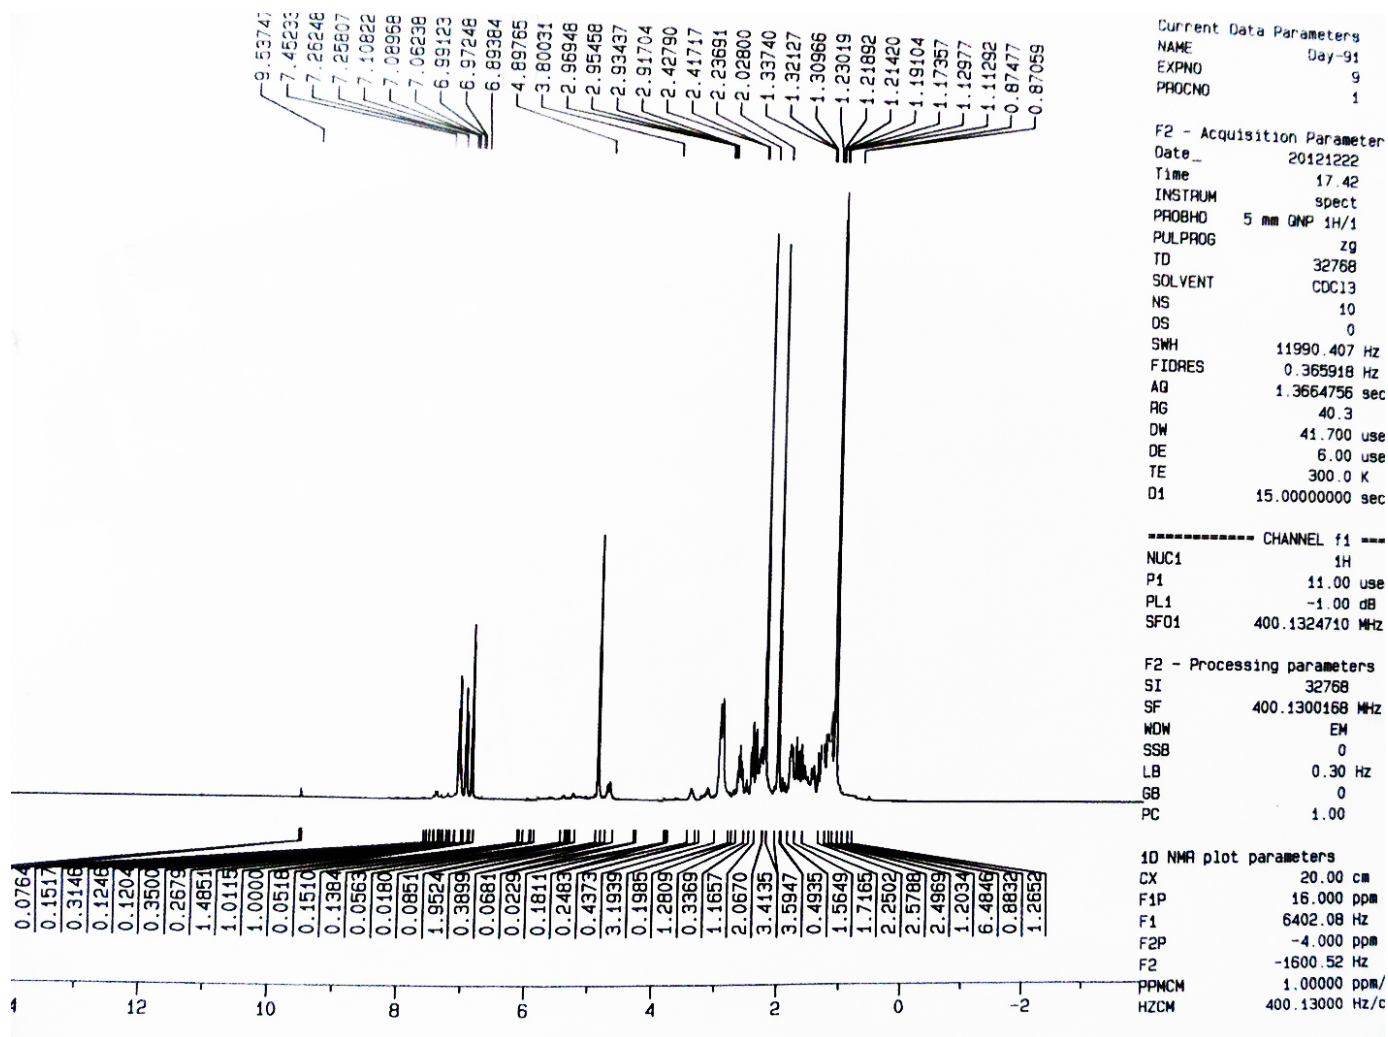

Supplementary 1.1. <sup>1</sup>H-NMR of Ketoethiopinone (1)

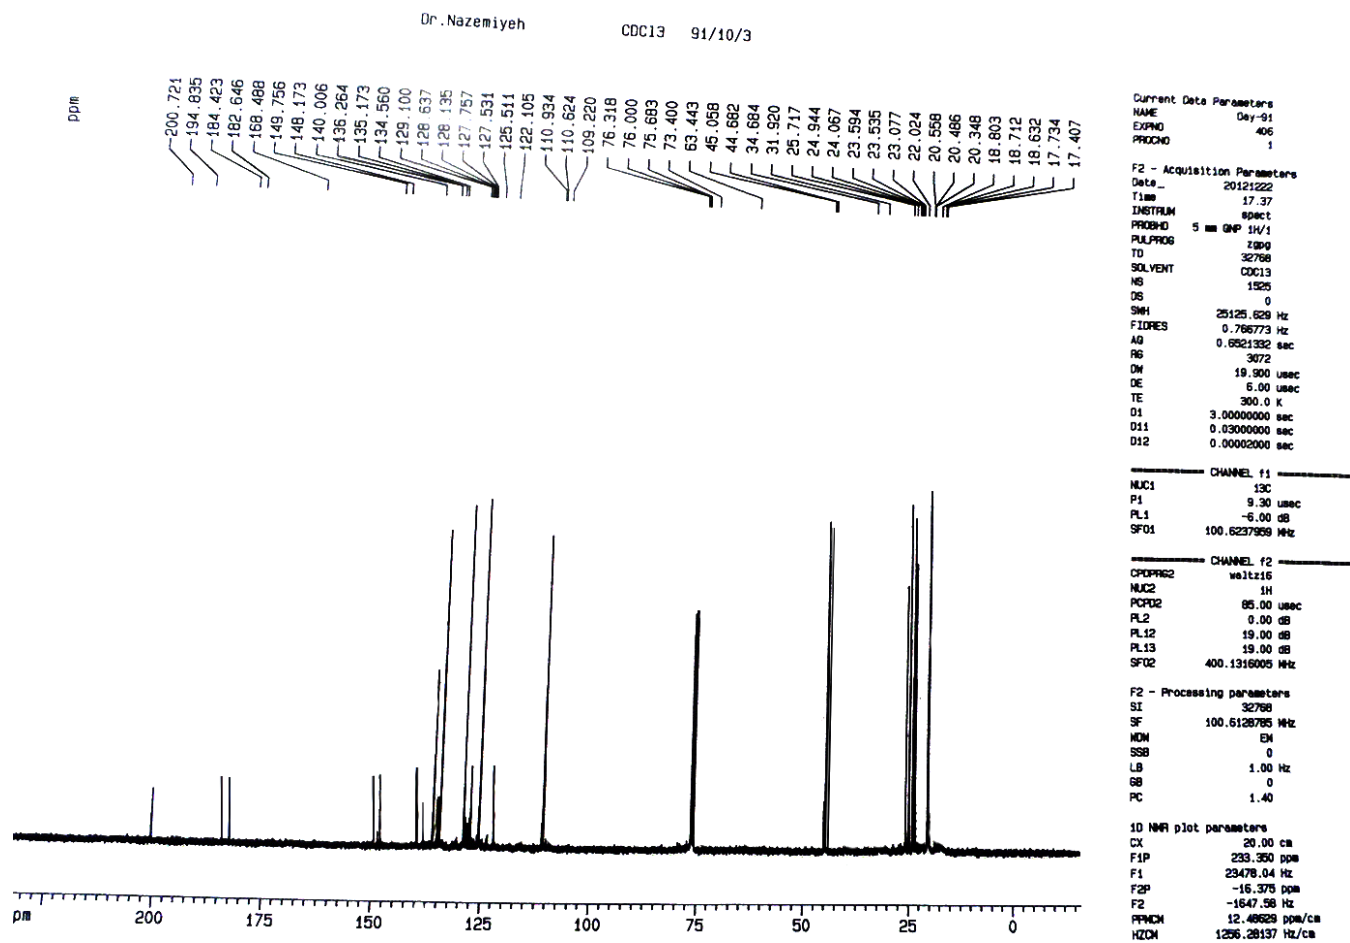

Supplementary 1.2.  $^{13}\text{C}$ -NMR of Ketoethiopinone (1)

Dr.Nazemiyeh

CDC13 91/10/2

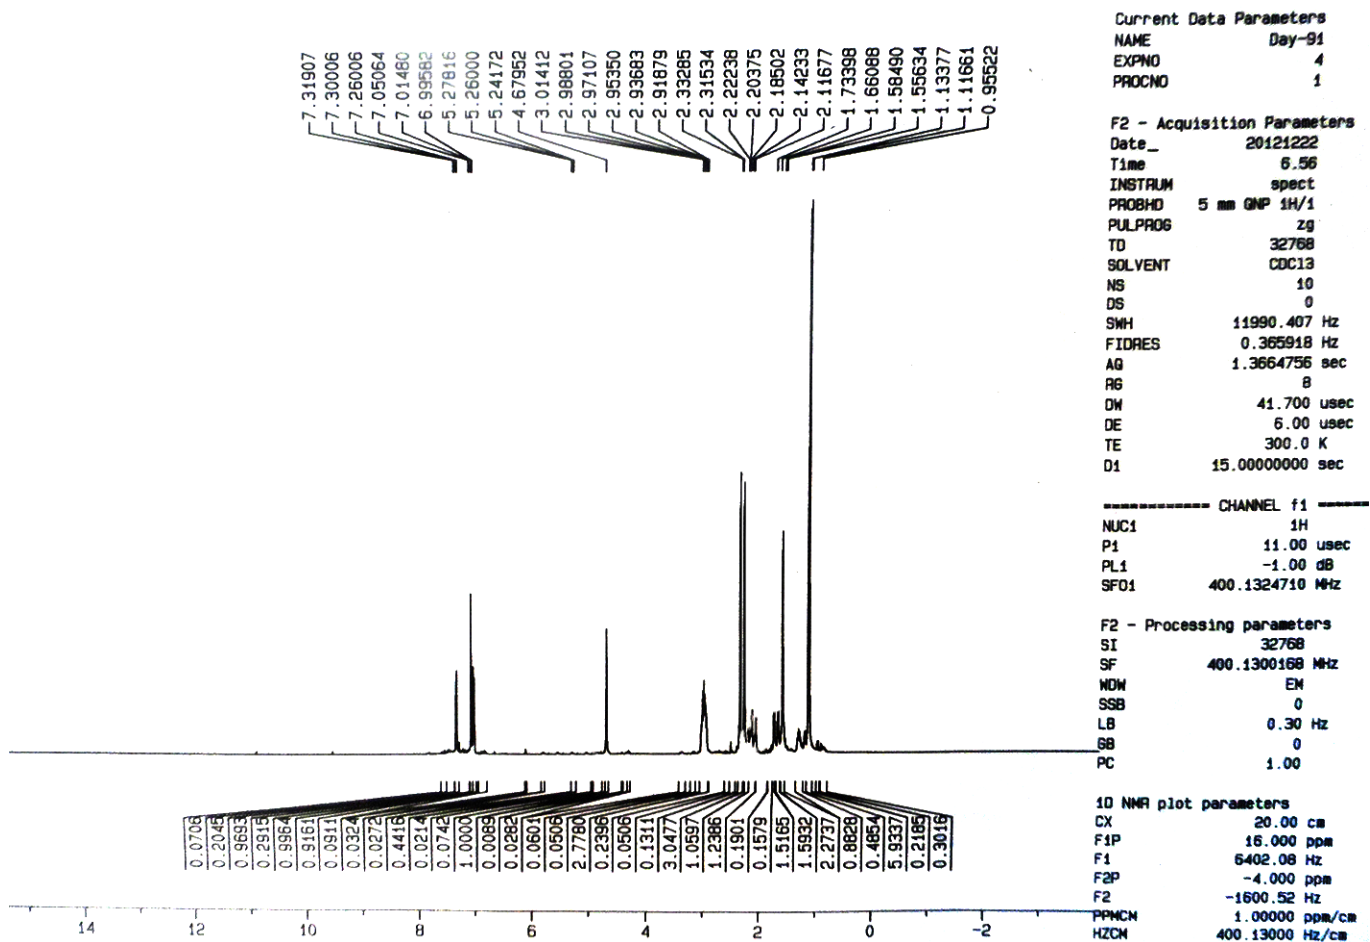Supplementary 2.1. <sup>1</sup>H-NMR of Ortho-diacetate aethiopinone (2)

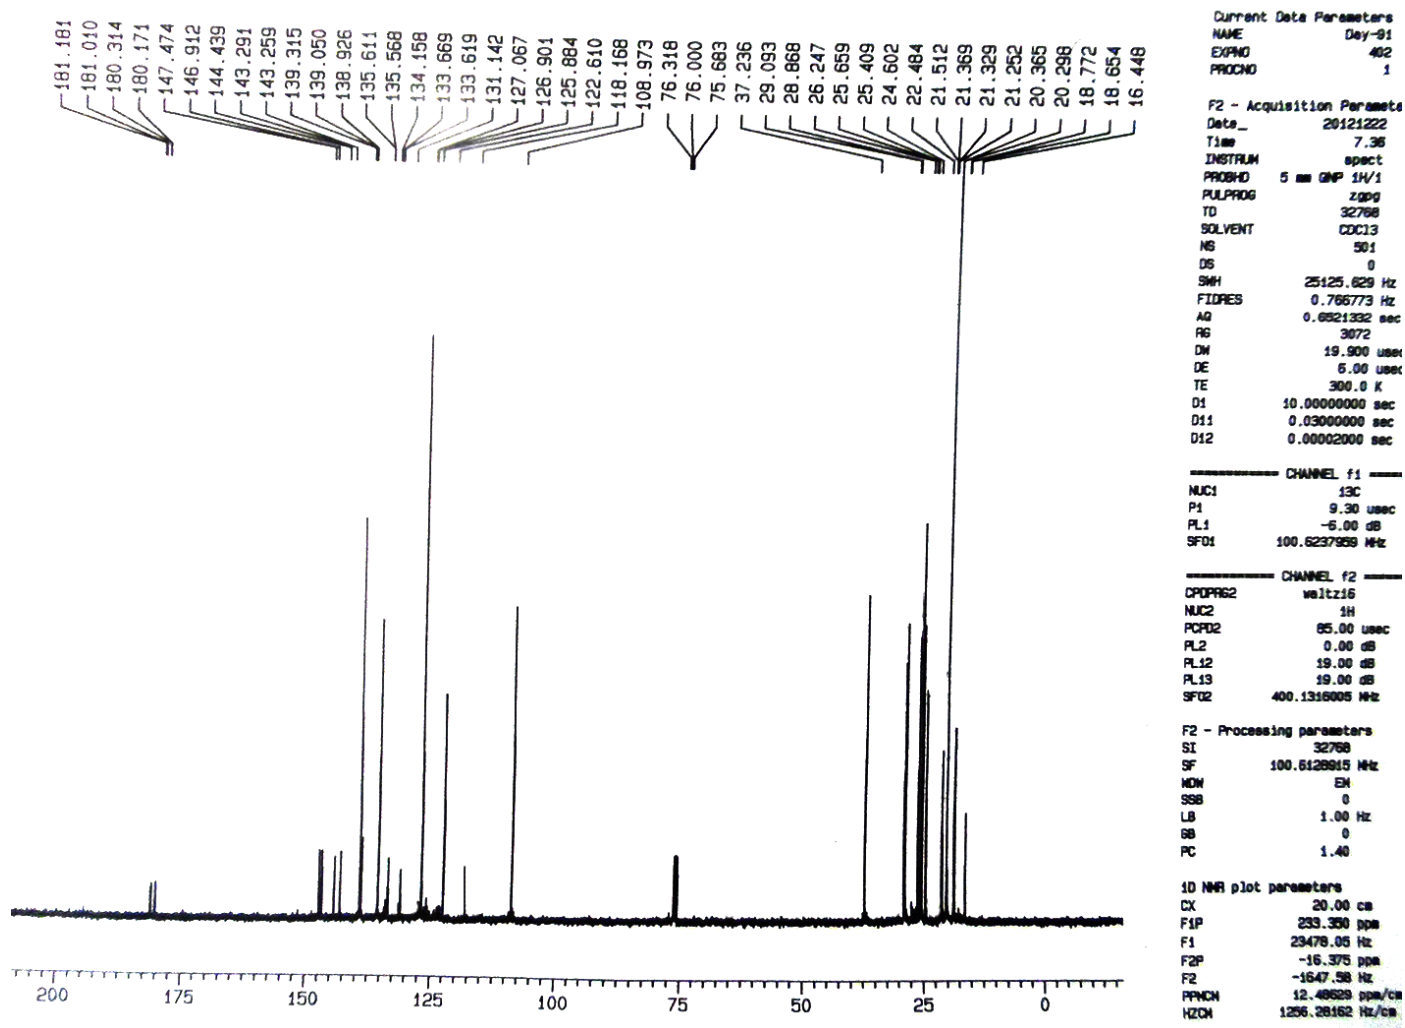

Supplementary 2.2.  $^{13}\text{C}$ -NMR of Ortho-diacetate aethiopinine (2)
